# Supplementary material for: Structure models for the hydrated and dehydrated nitrate-intercalated layered double hydroxide of Li and Al
Source: Royal Society of Chemistry journal article supplement (doi:10.1039/c6dt03769k), 2016-01-01
Supplement: c6dt03769k1.pdf [file c6dt03769k1.pdf]

**Structure models for the hydrated and dehydrated nitrate-intercalated  
layered double hydroxide of Li and Al**

Supreeth Nagendran,<sup>a</sup> Ganga Periyasamy<sup>a</sup> and P. Vishnu Kamath\*<sup>a</sup>

**Electronic Supporting Information**

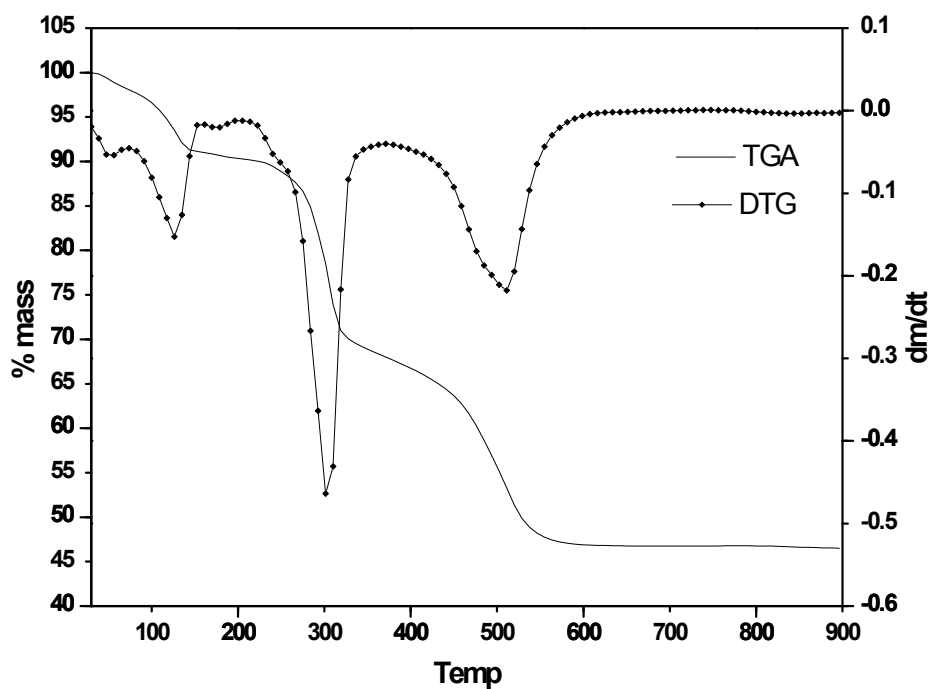

Fig. S1 TGA and DTG curves for the as-prepared [Li-Al-NO<sub>3</sub>] (phase I).

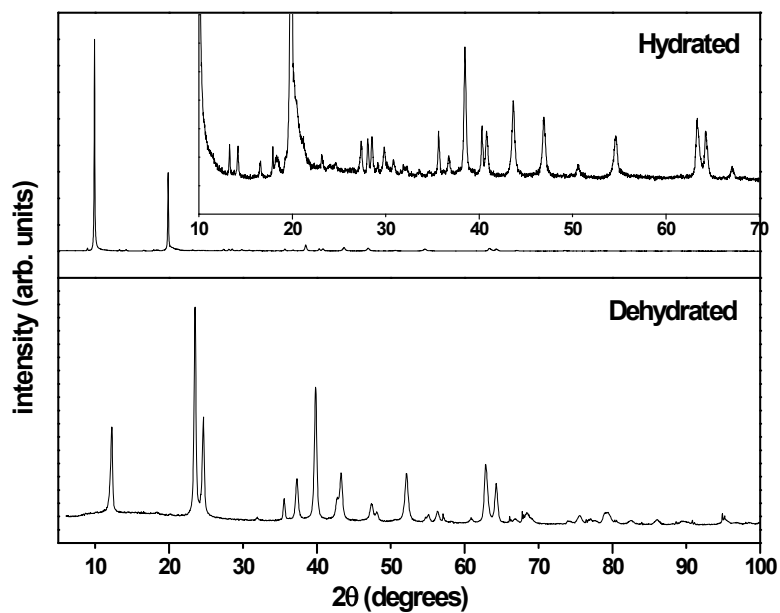

Fig. S2 PXRD pattern of the as-prepared [Li-Al-NO<sub>3</sub>] LDH (phase I) compared with that of the dehydrated LDH (phase-II) (50 °C, in vacuo) (data from Russia). Inset shows the data on an expanded intensity scale.

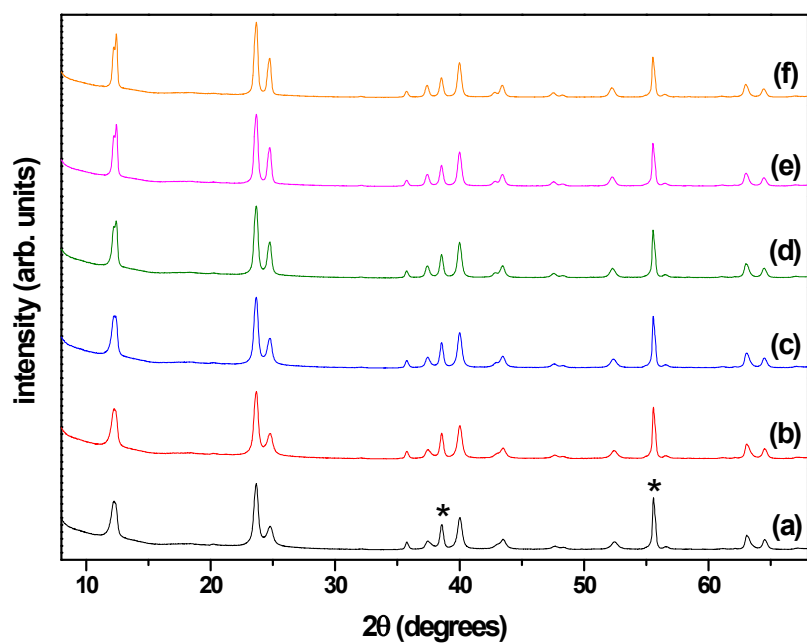

**Fig. S3** *In situ* variable temperature PXRD measurements of the dehydrated [Li-Al-NO<sub>3</sub>] LDH (phase II) at (a) 30 °C (b) 50 °C (c) 100 °C (d) 150 °C (e) 175 °C (f) 200 °C. Reflections marked by asterisk are due to the Ta strip used as the substrate.

**Table S1 Assignment of the prominent observed Bragg reflections\* of phase I**

|                      | Hexagonal<br>$a = 5.08 \text{ \AA}$ ,<br>$c = 17.91 \text{ \AA}$ |
|----------------------|------------------------------------------------------------------|
| $2\theta [^\circ]^*$ | $hkl$                                                            |
| 9.9                  | 002                                                              |
| 19.9                 | 004                                                              |
| 35.7                 | 111                                                              |
| 36.8                 | 112                                                              |
| 38.5                 | 113                                                              |
| 40.3                 | 008                                                              |
| 40.8                 | 114                                                              |
| 43.6                 | 115                                                              |
| 46.9                 | 116                                                              |
| 50.6                 | 117                                                              |
| 54.6                 | 118                                                              |
| 63.4                 | 300                                                              |
| 64.2                 | 302                                                              |
| 67.1                 | 217                                                              |
| 73.5                 | 304                                                              |

\* Weak reflections appearing in the range of 11-19 °2 $\theta$  and 22-35 °2 $\theta$  are excluded.

**Table S2 Refined atomic position parameters of phase I in hexagonal symmetry**

| Atom type | Wyckoff position | $x$      | $y$     | $z$     | SOF     |
|-----------|------------------|----------|---------|---------|---------|
| O1        | 12 <i>i</i>      | -0.00438 | 0.64234 | 0.05222 | 1       |
| Al        | 4 <i>f</i>       | 0.33330  | 0.66670 | 0.00000 | 1       |
| Li        | 2 <i>b</i>       | 0.00000  | 0.00000 | 0.00000 | 1       |
| N         | 6 <i>h</i>       | 0.37839  | 0.01141 | 0.25000 | 0.33333 |
| O2        | 12 <i>i</i>      | 0.25144  | 0.78233 | 0.19887 | 0.16667 |
| O3        | 12 <i>i</i>      | 0.19568  | 0.06039 | 0.28745 | 0.16667 |
| O4        | 12 <i>i</i>      | 0.64912  | 0.10755 | 0.26987 | 0.16667 |
| O5        | 12 <i>i</i>      | 0.97566  | 0.38073 | 0.30063 | 0.20249 |

**Table S3 Refined bond lengths and angles of phase I in hexagonal symmetry**

| <b>Bond distances (Å)</b>       |                |
|---------------------------------|----------------|
| Al – O1                         | 1.8729, 1.9027 |
| Li – O1                         | 2.0338         |
| N-O2                            | 1.3623         |
| N-O3                            | 1.2664         |
| N-O4                            | 1.2595         |
| O2-O5                           | 2.5647         |
| O3-O5                           | 2.4950         |
| O4-O5                           | 2.6153         |
| Li-O3                           | 3.8991         |
| Al-O2                           | 3.6594         |
| O1-O5                           | 3.2210         |
| <b>Bond angles (°)</b>          |                |
| O1-Al-O1                        | 77.979, 86.954 |
| O1-Li-O1                        | 79.382         |
| O2-N-O3                         | 116.228        |
| O2-N-O4                         | 118.650        |
| O3-N-O4                         | 122.770        |
| <b>Non bonded distances (Å)</b> |                |
| In-plane O1 – O1                | 2.376, 2.598   |
